# Supplementary material for: Opioid rotation and conversion ratios used by palliative physicians and pharmacists in Japan
Source: Research Square preprint supplement (doi:10.21203/rs.3.rs-8216751/v1), 2026-02-09
Supplement: Supplementary file 1 [file 533e8a447f25340d459b1d56.docx]

**Supplement 1.** Contents of the survey form

A Survey of Opioid Rotation Ratios Used by Palliative Care Professionals

1. I’m a  physician  pharmacist  others __________

I’m a  female  male

My age is ______ (please write in numbers)

My years of clinical experience are ______ (please write in numbers)

Please indicate the number of years you have been involved in palliative care, such as cancer pain management and opioid treatment. ______ years

1. My specialty is
    palliative care
    chemotherapy
    surgical oncology
    radiation therapy
    primary care
    home medical care
    others ____________
   (More than one response allowed for this question.)
2. Whether or not you have qualifications related to cancer treatment and palliative care. (More than one response allowed for this question.)
    Diplomate, Specialty Board of Palliative Medicine, Japanese Society for Palliative Medicine

Certified Physician, Specialty Board of Palliative Medicine, Japanese Society for Palliative Medicine

Diplomate, Subspecialty Board of Medical Oncology, Japanese Society of Medical Oncology

General Clinical Oncologist, Japanese Board of Cancer Therapy

Board Certified Oncology Pharmacy Specialist

Board Certified Oncology Pharmacy Specialist

Board Certified Pharmacist in Oncology Pharmacy

Board Certified Pharmacist in Palliative Pharmacy

Board Certified Pharmacist-Scientist in Palliative Pharmacy

Accredited Pharmacist of Ambulatory Cancer Chemotherapy

Others _______________

1. I work in (select all that apply)

Inpatient palliative care

Home palliative care

Urban setting

Rural setting

Outpatient palliative care

Academic setting

Specialized cancer hospital

Other than academic setting and specialized cancer hospitals

Hospice

Nursing home

Other _______________

1. I work in

Hokkaido

Tohoku region

Kanto region

Chubu region

Kinki region

Chugoku region/Shikoku

Kyushu region

Okinawa

Other________________

1. Please check available strong opioids that can be used for cancer pain management in your workplace. (check all that apply)
    oral morphine

intravenous/subcutaneous morphine

morphine suppository

fentanyl transdermal

intravenous/subcutaneous fentanyl

oral transmucosal fentanyl

oral oxycodone

intravenous/subcutaneous oxycodone

oral hydromorphone

intravenous/subcutaneous hydromorphone

oral methadone

oral tapentadol

1. I have performed approximately _____ number of opioid rotations in the last 6 months

>30

10～30

<10

1. The first line strong opioid that I usually prescribe is

morphine

fentanyl transdermal

oxycodone

hydromorphone

methadone

tapentadol

others ______________

1. The second line opioid I usually prescribe is

morphine

fentanyl transdermal

oxycodone

hydromorphone

methadone

tapentadol

other ______________

1. Based on your daily practice, what opioid doses would you use in the following opioid conversion and rotation scenarios (do not decrease for incomplete cross tolerance)? If the opioid/opioids is/are unavailable where you practice, please check “not available”.
   1. 1 mg intravenous/subcutaneous morphine = _______ mg of oral morphine
       1

2

3

not available

I don’t know

other_______________

- 1. 1 mg intravenous/subcutaneous hydromorphone = _____ mg of oral hydromorphone
      3

4

5

6

not available

I don’t know

other_______________

- 1. 1 mg intravenous/subcutaneous oxycodone = ______mg of oral oxycodone

1

1.33

1.5

not available

I don’t know

other_______________

- 1. 1 mg intravenous/subcutaneous hydromorphone = ______ mg of oral morphine
      20

25

30

not available

I don’t know

other_______________

- 1. 1 mg intravenous/subcutaneous oxycodone = ______ mg of oral morphine
      1

2

3

not available

I don’t know

other_______________

- 1. 1 mg oral hydromorphone = ________ mg of oral morphine
      4

5

6

not available

I don’t know

other_______________

- 1. 1 mg oral oxycodone = ______ mg of oral morphine
      1

1.5

2

not available

I don’t know

other_______________

- 1. Fentanyl transdermal 25 mcg/hr = _______ mg of oral morphine equivalent daily dose
      50

60

70

not available

I don’t know

other_______________

- 1. Oral morphine equivalent daily dose of 100 mg = ________mcg/hr Fentanyl transdermal
      37.5

41.6

45

not available

I don’t know

other_______________

- 1. 1 mg intravenous/subcutaneous morphine = ________mcg of intravenous/subcutaneous fentanyl
      50

100

150

200

not available

I don’t know

other_______________

- 1. 30 mcg intravenous/subcutaneous fentanyl = ______ mg of intravenous/subcutaneous morphine
      2

3

4

5

not available

I don’t know

other_______________

- 1. 5 mg oral tapentadol = _______ mg of oral oxycodone
      0.5

1

1.5

not available

I don’t know

other_______________
